# Supplementary material
Source: PubMed Central journal article supplement (PMC4988394)
Supplement: NIHMS759476-supplement.pdf [file NIHMS759476-supplement.pdf]

**Table S1. Baseline Characteristics Stratified by Visual Acuity at Baseline (Post hoc).** Participants with both eyes enrolled are counted twice (by eye), once for each of the treatment sequences to which an eye was randomly assigned.

| Variable                                                              | Category                           | Worse-seeing eyes<br>( $< 69$ letters) | Better-seeing eyes<br>( $\geq 69$ letters) | Total                           |
|-----------------------------------------------------------------------|------------------------------------|----------------------------------------|--------------------------------------------|---------------------------------|
| <b>Group</b>                                                          | Total Eyes                         | 35                                     | 27*                                        | 62                              |
| <b>Age (years)</b>                                                    | Min / Median ( <b>Mean</b> ) / Max | 39 / 62 ( <b>64</b> ) / 87             | 39 / 62 ( <b>62</b> ) / 85                 | 39 / 62 ( <b>63</b> ) / 87      |
| <b>Diabetes Type</b>                                                  | Type 1                             | 1 (3%)                                 | 6 (22%)                                    | 7 (11.3%)                       |
|                                                                       | Type 2                             | 34 (97%)                               | 21 (78%)                                   | 55 (88.7%)                      |
| <b>Hemoglobin</b>                                                     | Min / Median ( <b>Mean</b> ) / Max | 5.8 / 7.6 ( <b>7.8</b> ) / 12.2        | 6.4 / 7.8 ( <b>8.4</b> ) / 12.0            | 5.8 / 7.6 ( <b>8.1</b> ) / 12.2 |
| <b>A1C (%)</b>                                                        | $\geq 8.0\%$                       | 12 (34%)                               | 12 (44%)                                   | 24 (38%)                        |
| <b>Gender</b>                                                         | Female                             | 17 (49%)                               | 7 (26%)                                    | 24 (38.7%)                      |
|                                                                       | Male                               | 18 (51%)                               | 20 (74%)                                   | 38 (61.3%)                      |
| <b>Race</b><br>(Participant-reported)                                 | Asian                              | 3 (9%)                                 | 0                                          | 3 (4.8%)                        |
|                                                                       | Black                              | 6 (17%)                                | 2 (7%)                                     | 8 (12.9%)                       |
|                                                                       | Multiple race                      | 0                                      | 3 (11%)                                    | 3 (4.8%)                        |
|                                                                       | Unknown                            | 0                                      | 2 (7%)                                     | 2 (3.2%)                        |
|                                                                       | White                              | 26 (74%)                               | 20 (74%)                                   | 46 (74.2%)                      |
| <b>Ethnicity</b><br>(Participant-reported)                            | Unknown                            | 1 (3%)                                 | 0                                          | 1 (1.6%)                        |
|                                                                       | Hispanic or Latino                 | 1 (3%)                                 | 2 (7%)                                     | 3 (4.8%)                        |
|                                                                       | Not Hispanic or Latino             | 33 (94%)                               | 25 (93%)                                   | 58 (93.5%)                      |
| <b>Best-Corrected Visual Acuity (letters)</b>                         | Min / Median ( <b>Mean</b> ) / Max | 32 / 61 ( <b>58</b> ) / 68             | 69 / 72 ( <b>72</b> ) / 78                 | 32 / 66 ( <b>64</b> ) / 78      |
| <b>OCT Central Subfield Mean Thickness (<math>\mu\text{m}</math>)</b> | Min / Median ( <b>Mean</b> ) / Max | 362 / 487 ( <b>496</b> ) / 720         | 334 / 421 ( <b>451</b> ) / 643             | 334 / 453 ( <b>477</b> ) / 720  |

\* One participant with a single eye in the better-seeing group withdrew after his week 4 visit following a cerebrovascular accident and was not included in the analysis; all other participants/eyes completed the study and were included in the analysis
